# Supplementary material for: In situ phase transition induced TM–MoC/Mo2C (TM= Fe, Co, Ni, and Cu) heterostructure catalysts for efficient hydrogen evolution
Source: Royal Society of Chemistry journal article supplement (doi:10.1039/d2ta00727d), 2022-01-01
Supplement: d2ta00727d1.pdf [file d2ta00727d1.pdf]

# In-situ Phase Transition Induced TM-MoC/Mo<sub>2</sub>C (TM= Fe, Co, Ni, and Cu) Heterostructure Catalysts for Efficient Hydrogen Evolution

Jiancheng Li<sup>a#</sup>, Riyue Ge<sup>a#</sup>, Panpan Lan<sup>a</sup>, Jack Yang<sup>b</sup>, Jing Feng<sup>c</sup>, Ying Li<sup>a</sup>, Mingyuan Zhu<sup>a</sup>, Sean Li<sup>b</sup>, Bin Liu<sup>a,\*</sup>, and Wenxian Li<sup>a,b,\*\*</sup>

<sup>a</sup> *School of Materials Science and Engineering, Shanghai University, Shanghai 200444, China*

<sup>b</sup> *School of Materials Science and Engineering, University of New South Wales, Sydney, NSW 2052, Australia*

<sup>c</sup> *Faculty of Materials Science and Engineering, Kunming University of Science and Technology, Kunming 650093, China*

## Corresponding authors

\* E-mail: binliu@shu.edu.cn;

\*\* E-mail: shuliwx@t.shu.edu.cn.

#These two authors contributed equally to this work.

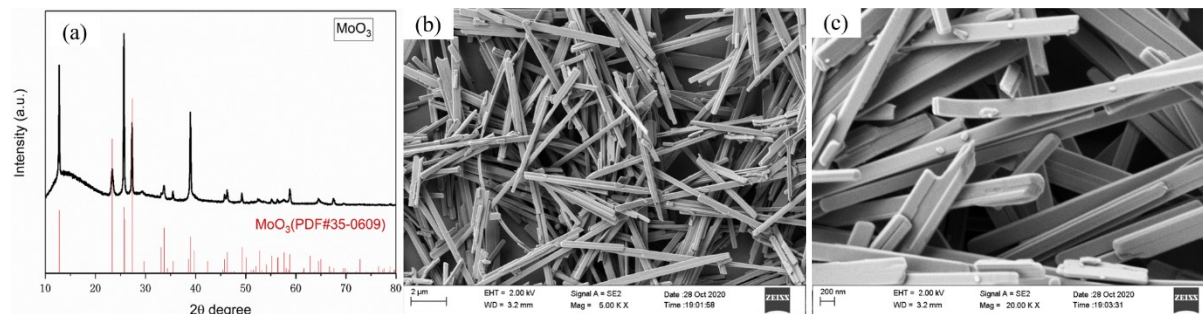

**Figure S1** (a)XRD pattern and (b,c)SEM images of Co-MoO<sub>3</sub>

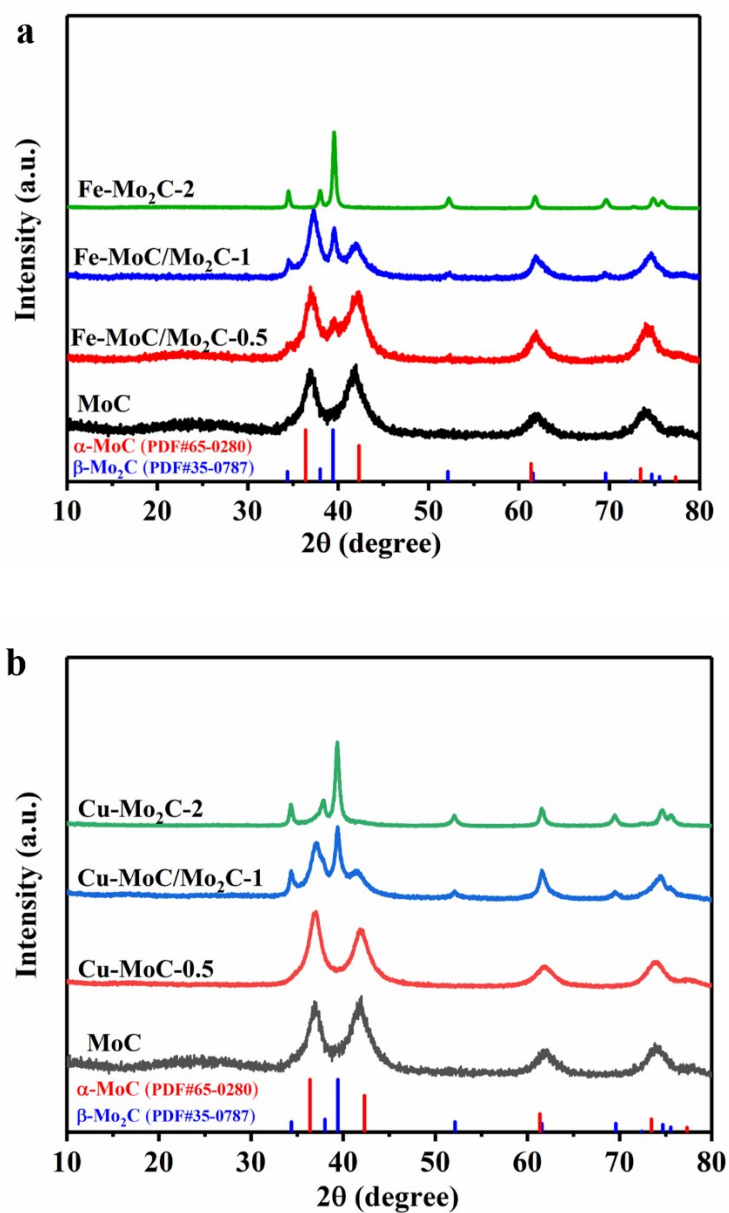

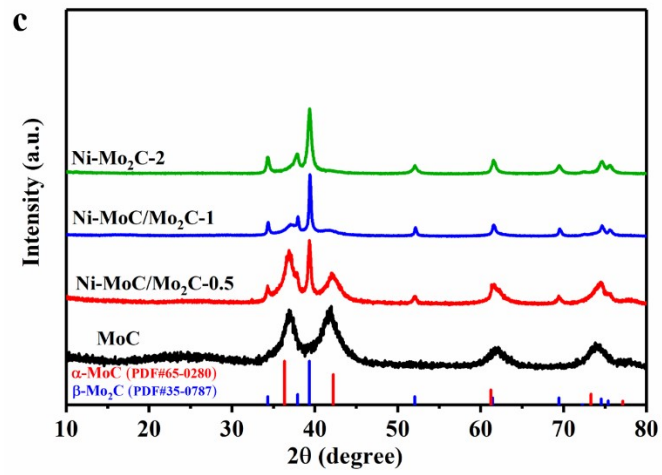

**Figure S2** XRD patterns of (a)Fe, (b)Cu, (c)Ni coupled samples.

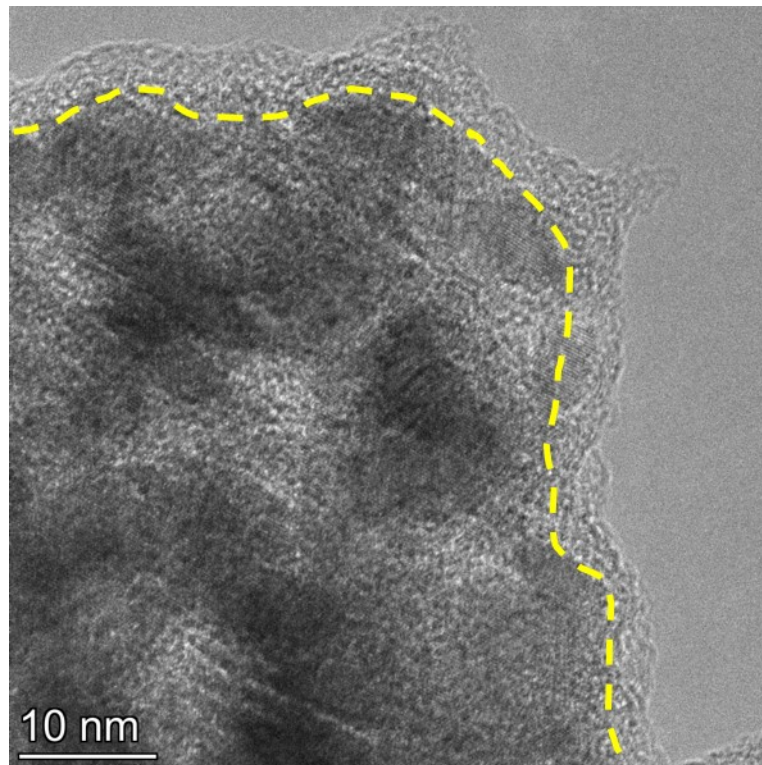

**Figure S3** Carbon layer around the Co-MoC/Mo<sub>2</sub>C-0.5

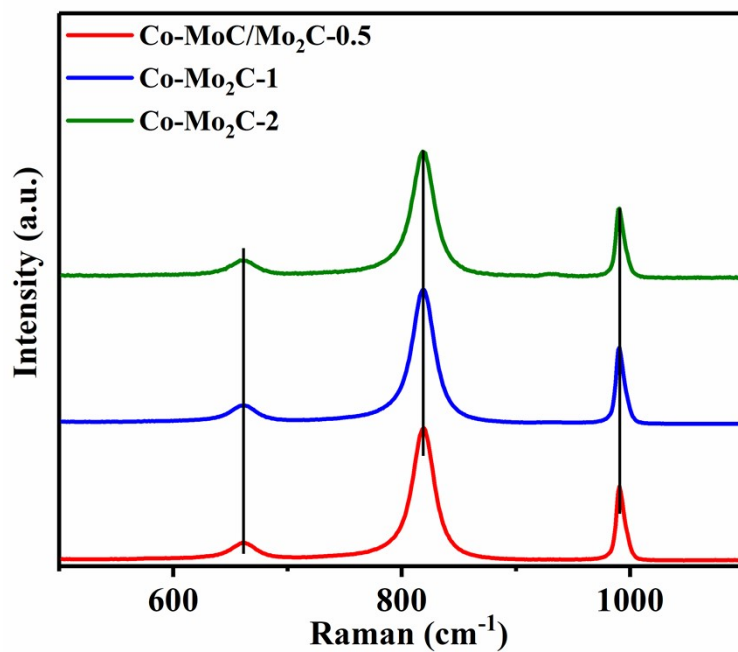

**Figure S4** Low-wave Raman patterns of Co-MoC/Mo<sub>2</sub>C-0.5, Co-Mo<sub>2</sub>C-1 and Co-Mo<sub>2</sub>C-2

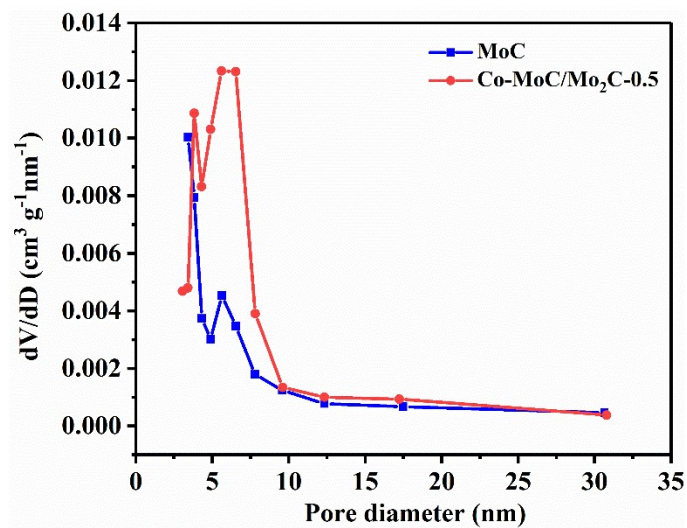

**Figure S5** Pore size distribution plots of pure MoC and Co-MoC/Mo<sub>2</sub>C.

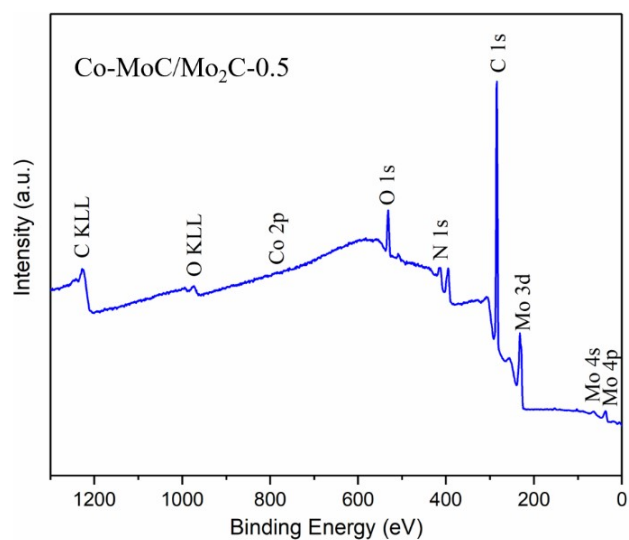

**Figure S6** XPS survey spectrum of Co-MoC/Mo<sub>2</sub>C-0.5

**Table S1** Fitting parameters (peak position, peak area, and species percentage) for Mo 3d spectra taken on the Co-Mo<sub>x</sub>C catalysts

| catalysts                            | Species          | peaks             |                   | Area              |                   | Mo <sup>2+</sup><br>and<br>Mo <sup>3+</sup> |
|--------------------------------------|------------------|-------------------|-------------------|-------------------|-------------------|---------------------------------------------|
|                                      |                  | 3d <sub>5/2</sub> | 3d <sub>3/2</sub> | 3d <sub>5/2</sub> | 3d <sub>3/2</sub> |                                             |
|                                      | Mo <sup>3+</sup> | 228.7             | 231.8             | 46849             | 33463             |                                             |
| MoC                                  | Mo <sup>4+</sup> | 229.9             | 234.1             | 22031             | 16947             | 34.5                                        |
|                                      | Mo <sup>6+</sup> | 232.7             | 235.8             | 67968             | 45312             |                                             |
| Co-<br>MoC/Mo <sub>2</sub> C-<br>0.5 | Mo <sup>2+</sup> | 228.2             | 231.5             | 13145             | 8648              |                                             |
|                                      | Mo <sup>3+</sup> | 229.1             | 232.1             | 7764              | 11413             |                                             |
|                                      | Mo <sup>4+</sup> | 229.8             | 233.4             | 7681              | 5155              | 56.1                                        |
|                                      | Mo <sup>6+</sup> | 232.8             | 236.2             | 11236             | 8025              |                                             |

|                         |                  |       |       |       |       |      |
|-------------------------|------------------|-------|-------|-------|-------|------|
|                         | Mo <sup>2+</sup> | 228.1 | 231.4 | 31542 | 21028 |      |
| Co- Mo <sub>2</sub> C-1 | Mo <sup>4+</sup> | 229.5 | 234.6 | 18945 | 1739  | 31.4 |
|                         | Mo <sup>6+</sup> | 233   | 236.2 | 62616 | 31308 |      |

**Table S2** Fitting parameters of peak position for Mo<sup>2+</sup> and Mo<sup>3+</sup> spectra taken on the Co-MoC/Mo<sub>2</sub>C-0.5, Ni-MoC/Mo<sub>2</sub>C-0.5, Fe-MoC/Mo<sub>2</sub>C-0.5, and Cu-MoC/Mo<sub>2</sub>C-0.5 catalysts.

| Catalysts                        | Species          | Peaks             |                   |
|----------------------------------|------------------|-------------------|-------------------|
|                                  |                  | 3d <sub>5/2</sub> | 3d <sub>3/2</sub> |
| Co-MoC/Mo <sub>2</sub> C-<br>0.5 | Mo <sup>2+</sup> | 228.2             | 231.5             |
|                                  | Mo <sup>3+</sup> | 229.1             | 232.1             |
| Ni-MoC/Mo <sub>2</sub> C-<br>0.5 | Mo <sup>2+</sup> | 228.3             | 231.3             |
|                                  | Mo <sup>3+</sup> | 228.7             | 231.6             |
| Fe-MoC/Mo <sub>2</sub> C-<br>0.5 | Mo <sup>2+</sup> | 228.9             | 232.1             |
|                                  | Mo <sup>3+</sup> | 229.5             | 232.4             |
| Cu-MoC/Mo <sub>2</sub> C-<br>0.5 | Mo <sup>2+</sup> | 229.1             | 232.4             |
|                                  | Mo <sup>3+</sup> | 229.5             | 233.1             |

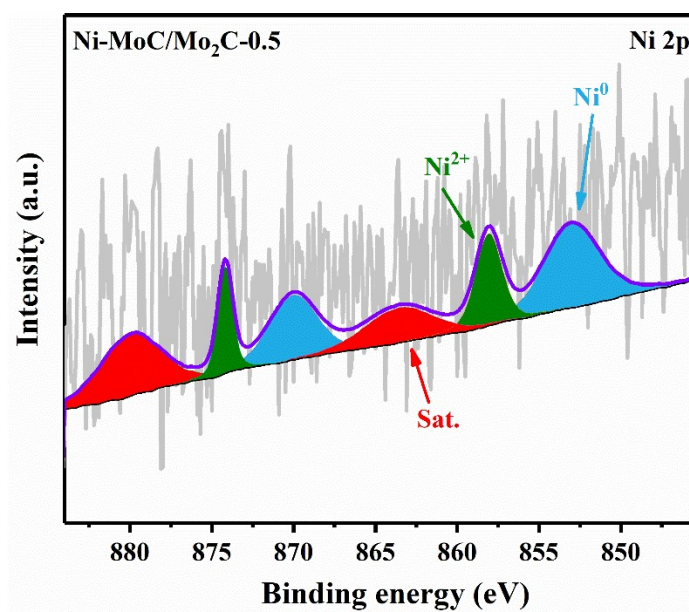

Figure S7: Ni 2p spectra of Ni-MoC/Mo<sub>2</sub>C-0.5

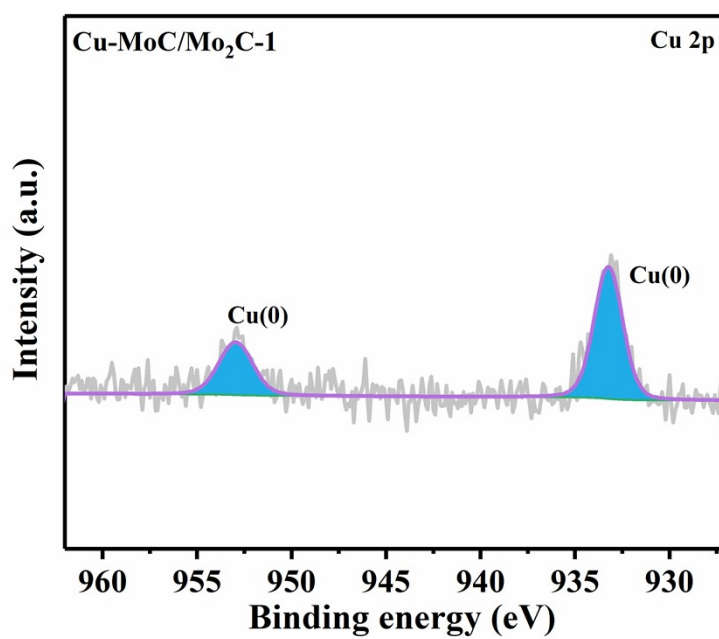

Figure S8. Cu 2p spectra of Cu-MoC/Mo<sub>2</sub>C-1

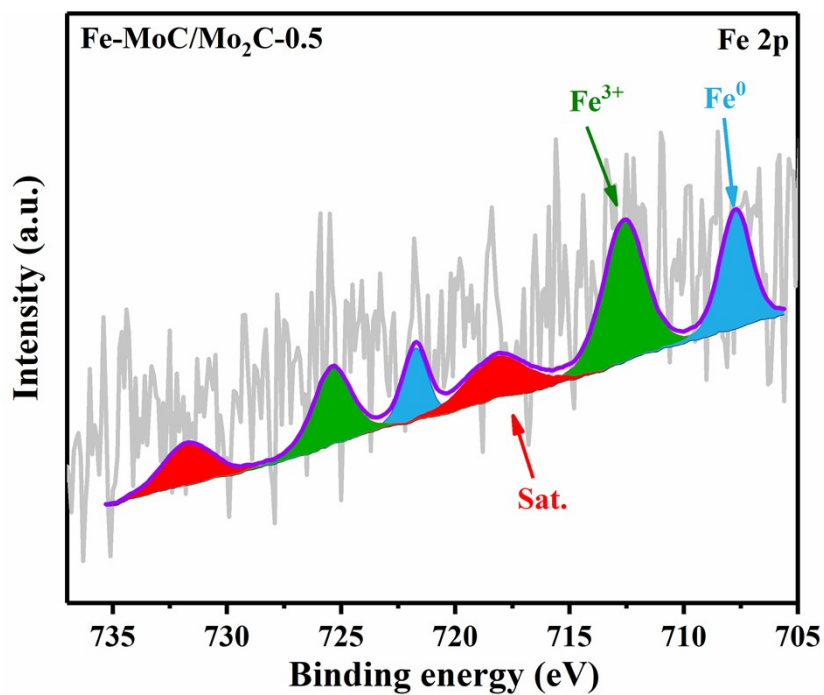

Figure S9. Fe 2p spectra of Fe-MoC/Mo<sub>2</sub>C-0.5

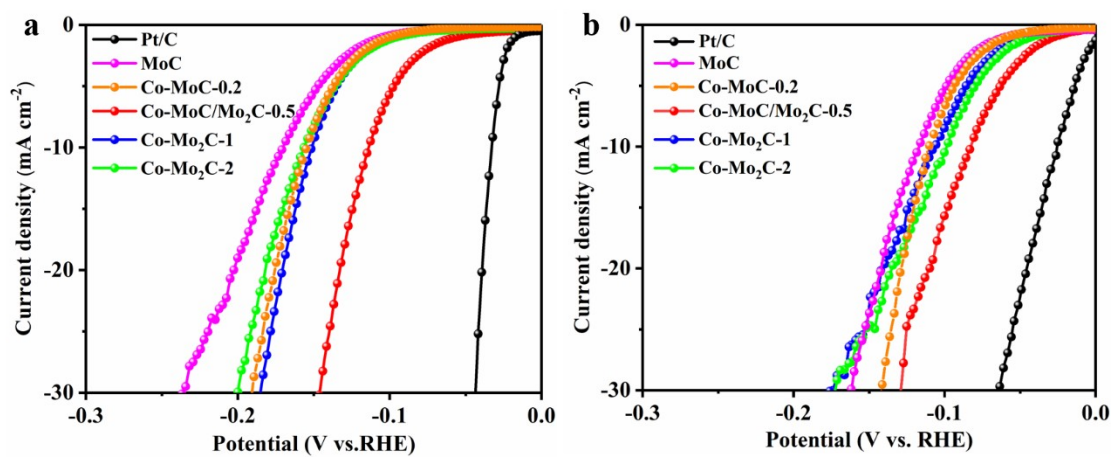

Figure S10. LSV of Co doped samples in (a) 0.5 M H<sub>2</sub>SO<sub>4</sub> and (b) 1 M KOH



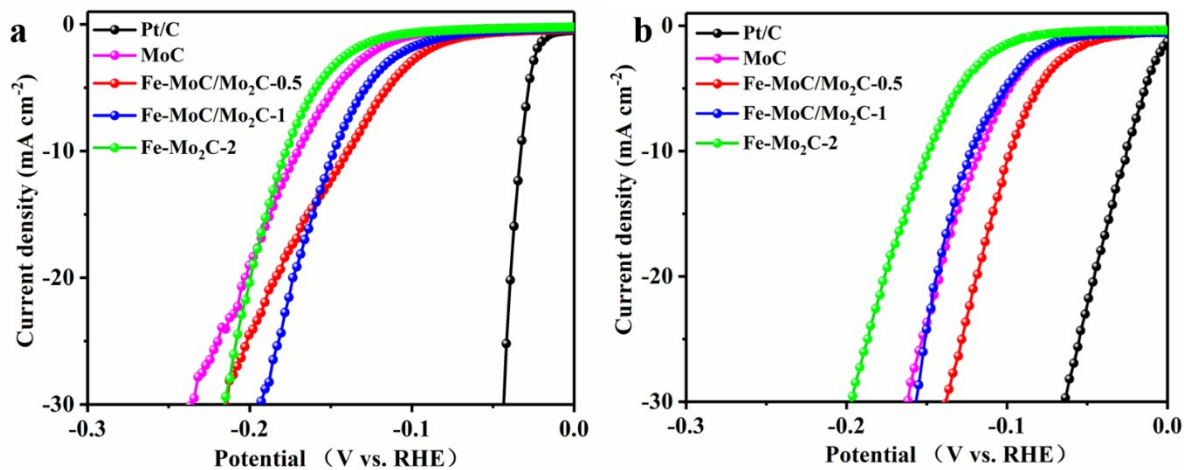

**Figure S11** LSV of Fe doped samples in (a) 0.5 M  $\text{H}_2\text{SO}_4$  and (b) 1 M KOH

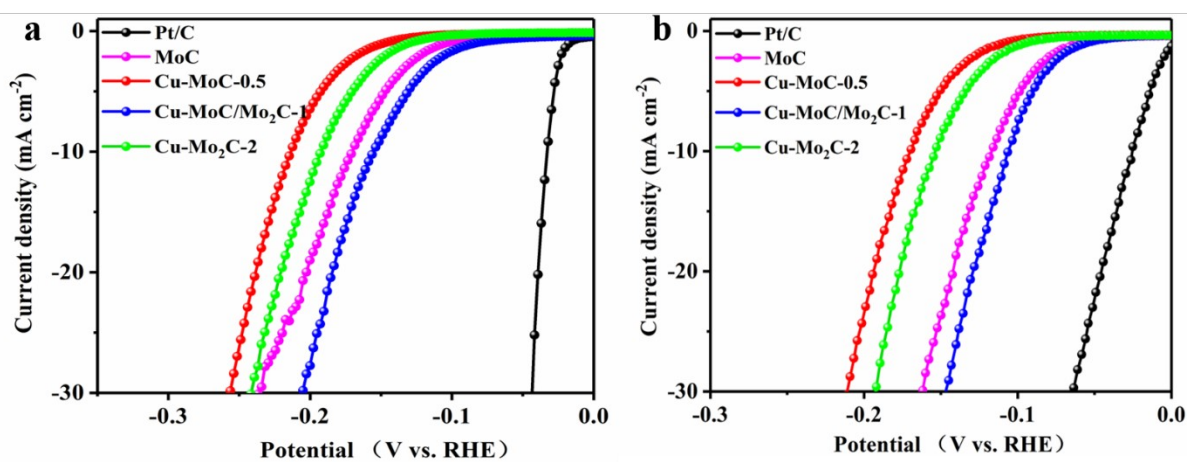

**Figure S12** LSV of Cu doped samples in (a) 0.5 M  $\text{H}_2\text{SO}_4$  and (b) 1 M KOH

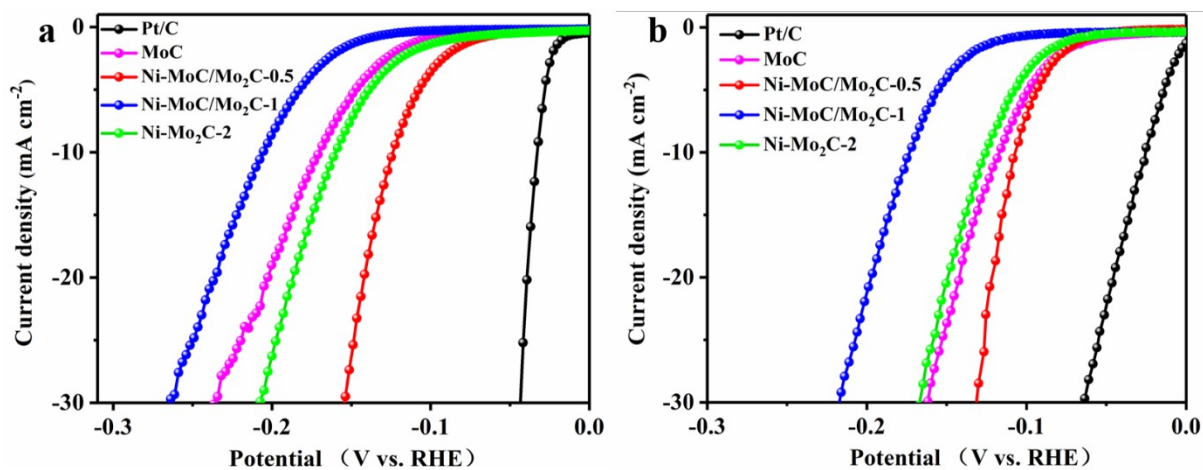

**Figure S13** LSV of Ni doped samples in (a) 0.5 M H<sub>2</sub>SO<sub>4</sub> and (b) 1 M KOH

**Table S3** HER activity comparison of recently published Mo-based catalysts in 0.5 M H<sub>2</sub>SO<sub>4</sub>

| Catalyst                                  | $\eta_{10}$ | Tafel slope | reference |
|-------------------------------------------|-------------|-------------|-----------|
| Ni/Mo <sub>2</sub> C (1:2)-NCNFs          | 143         | 57.8        | [1]       |
| MoC–Mo <sub>2</sub> C-31.4                | 126         | 43          | [2]       |
| Mo <sub>2</sub> C-carbon sphere           | 164         | 85          | [3]       |
| Mo <sub>x</sub> C-0.4                     | 155         | 53          | [4]       |
| Mo <sub>2</sub> N–Mo <sub>2</sub> C/HGr-3 | 157         | 55          | [5]       |
| Co-NC@Mo <sub>2</sub> C                   | 143         | 60          | [6]       |
| MoC <sub>x</sub> /C                       | 135         | 62          | [7]       |
| Mo <sub>2</sub> C–GNR                     | 152         | 65          | [8]       |
| Mo <sub>2</sub> C@SNC                     | 146         | 83          | [9]       |

**Table S4** Comparison of Catalytic Performance of Different HER Electrocatalysts in 0.5 M H<sub>2</sub>SO<sub>4</sub>

| Electrocatalyst              | $\eta_{10}$<br>(mV) | Tafel slope<br>(mV dec <sup>-1</sup> ) | $j_0$<br>(mA cm <sup>-2</sup> ) | $C_{dl}$<br>(mF cm <sup>-2</sup> ) |
|------------------------------|---------------------|----------------------------------------|---------------------------------|------------------------------------|
| MoC                          | 171                 | 77                                     | 0.14                            | 3.1                                |
| Co-MoC/Mo <sub>2</sub> C-0.5 | 114                 | 54                                     | 0.22                            | 17.9                               |
| Fe-MoC/Mo <sub>2</sub> C-0.5 | 138                 | 80                                     | 0.2                             | 8.9                                |
| Cu-MoC/Mo <sub>2</sub> C-1   | 156                 | 78                                     | 0.16                            | 4.4                                |
| Ni-MoC/Mo <sub>2</sub> C-0.5 | 124                 | 53                                     | 0.18                            | 9.1                                |

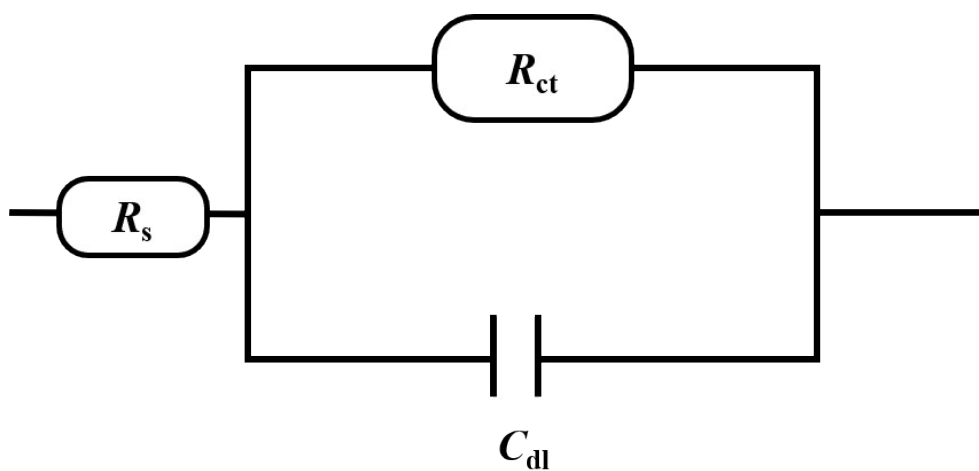

**Figure S14** Equivalent circuit model of the TM-MoC/Mo<sub>2</sub>C heterostructure catalysts in 0.5 M H<sub>2</sub>SO<sub>4</sub>.  $R_s$ : the electrolyte resistance,  $C_{dl}$ : double layer capacitance,  $R_{ct}$ : charge transfer resistance.

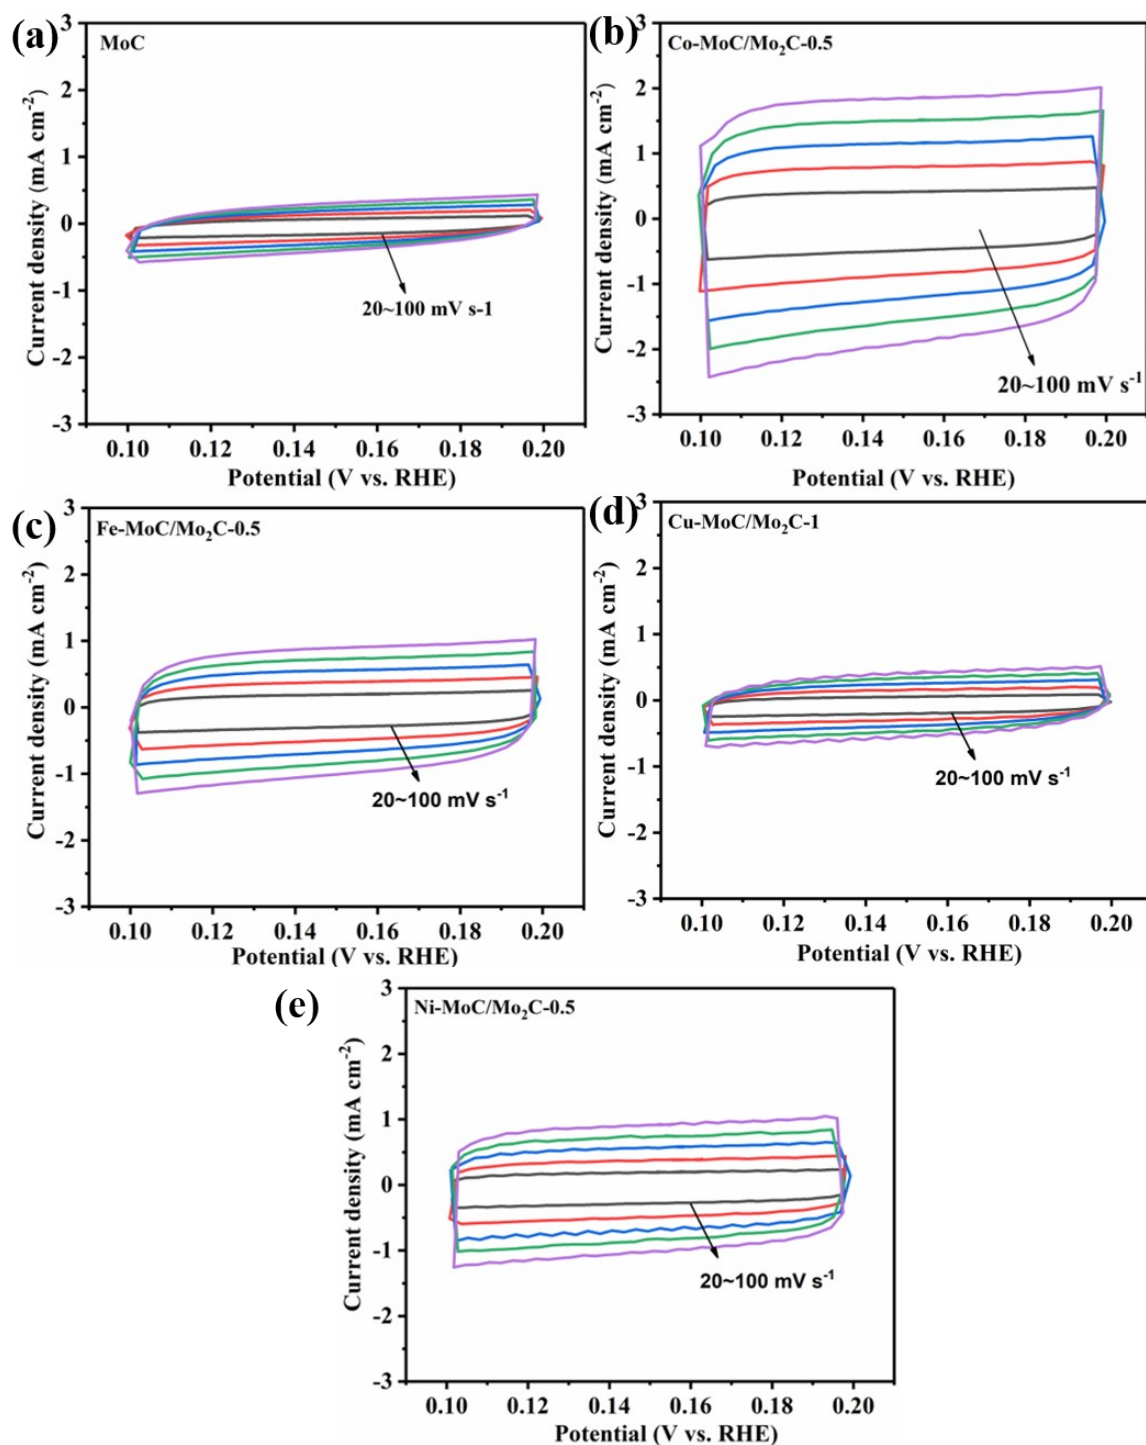

**Figure S15** Cyclic voltammograms in a non-faradaic potential region under different scan rates of (a) MoC, (b) Co-MoC/Mo<sub>2</sub>C-0.5, (c) Fe-MoC/Mo<sub>2</sub>C-0.5, (d) Cu-MoC/Mo<sub>2</sub>C-1, (e) Ni-MoC/Mo<sub>2</sub>C-0.5

**Table S5** Comparison of Catalytic Performance of Different HER Electrocatalysts in 1

| Electrocatalyst              | $\eta_{10}$<br>(mV) | Tafel slope<br>(mV dec <sup>-1</sup> ) | $j_0$<br>(mA cm <sup>-2</sup> ) | $C_{dl}$<br>(mF cm <sup>-2</sup> ) |
|------------------------------|---------------------|----------------------------------------|---------------------------------|------------------------------------|
| MoC                          | 120                 | 63                                     | 0.20                            | 5.5                                |
| Co-MoC/Mo <sub>2</sub> C-0.5 | 82                  | 53                                     | 0.44                            | 15.2                               |
| Fe-MoC/Mo <sub>2</sub> C-0.5 | 97                  | 56                                     | 0.29                            | 8.1                                |
| Cu-MoC/Mo <sub>2</sub> C-1   | 106                 | 50                                     | 0.21                            | 9.9                                |
| Ni-MoC/Mo <sub>2</sub> C-0.5 | 107                 | 40                                     | 0.14                            | 7.2                                |

M KOH

**Table S6** HER activity comparison of recently published Mo-based catalysts in 1 M KOH

| Catalyst                                  | $\eta_{10}$ | Tafel slope | Reference |
|-------------------------------------------|-------------|-------------|-----------|
| Mo <sub>2</sub> N–Mo <sub>2</sub> C/HGr-3 | 154         | 68          | [5]       |
| Co-NC@Mo <sub>2</sub> C                   | 99          | 66          | [6]       |
| MoC <sub>x</sub> /C                       | 150         | 99          | [7]       |
| Mo <sub>2</sub> C–GNR                     | 121         | 54          | [8]       |
| Co/ $\beta$ -Mo <sub>2</sub> C@N-CNTs     | 170         | 92          | [10]      |
| h-Mo <sub>2</sub> C/MoO <sub>2</sub>      | 92          | 56.6        | [11]      |

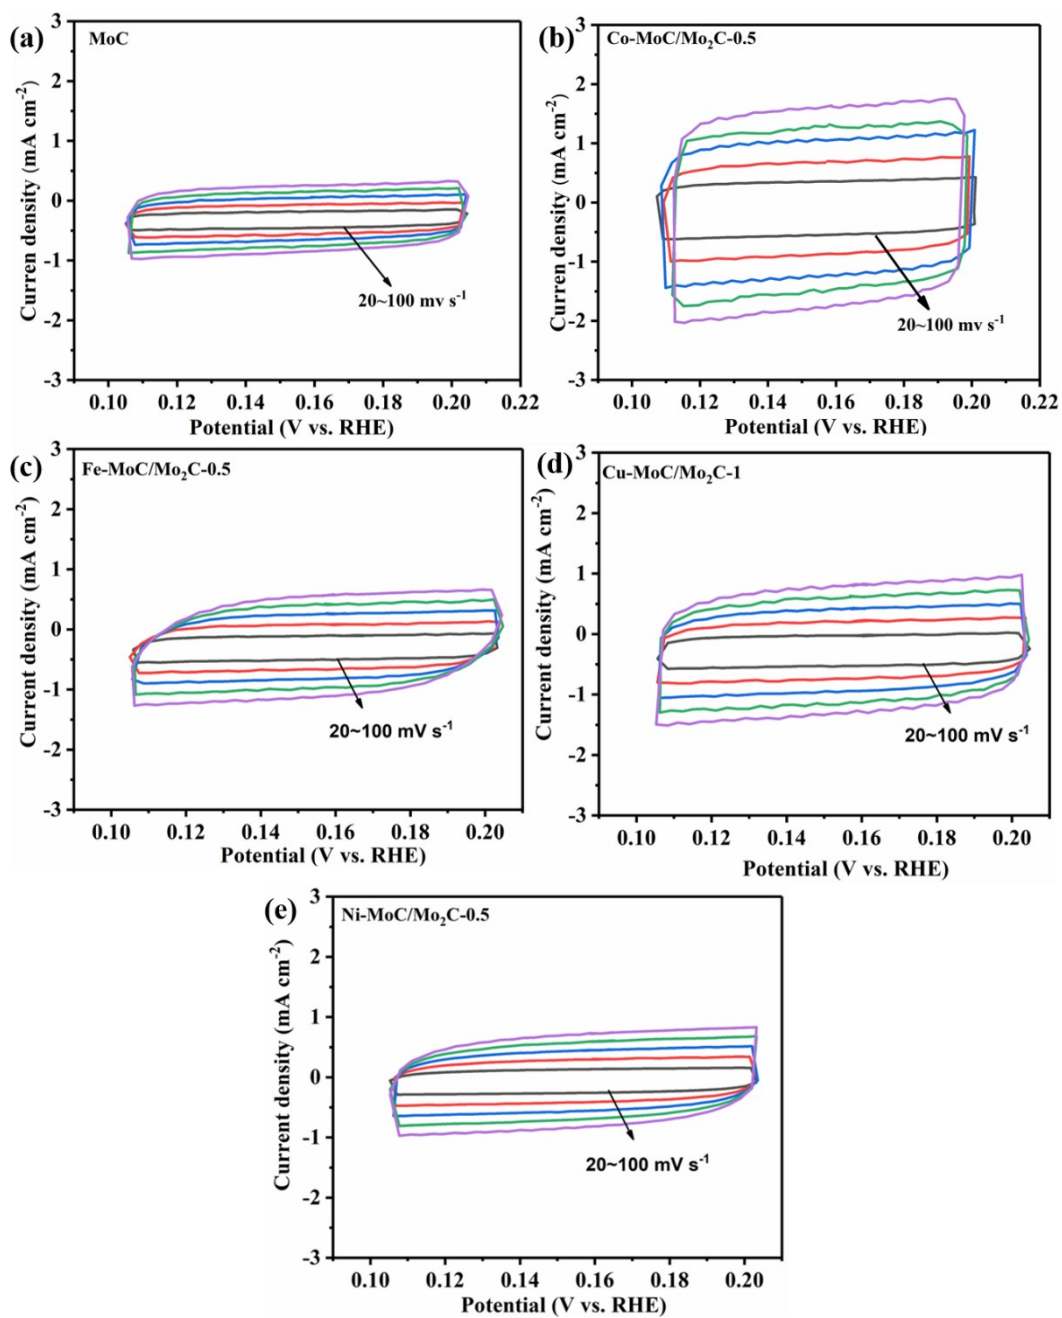

**Figure S16** Cyclic voltammograms in a non-faradaic potential region under different scan rates of (a) MoC, (b) Co-MoC/Mo<sub>2</sub>C-0.5, (c) Fe-MoC/Mo<sub>2</sub>C-0.5, (d) Cu-MoC/Mo<sub>2</sub>C-1, (e) Ni-MoC/Mo<sub>2</sub>C-0.5

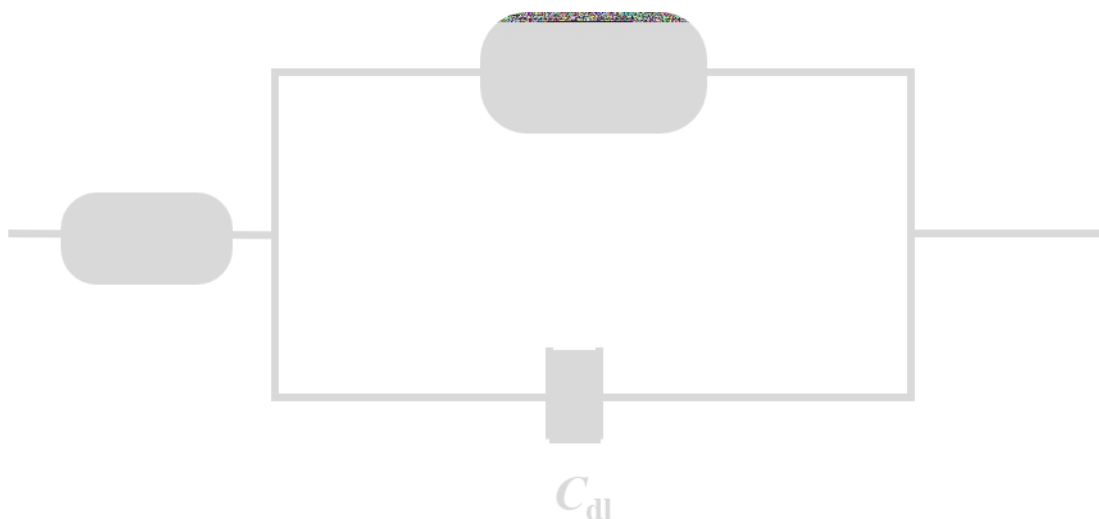

**Figure S17** Equivalent circuit model of the TM-MoC/Mo<sub>2</sub>C heterostructure catalysts in 1 M KOH.  $R_s$ : the electrolyte resistance,  $C_{dl}$ : double layer capacitance,  $R_{ct}$ : charge transfer resistance.

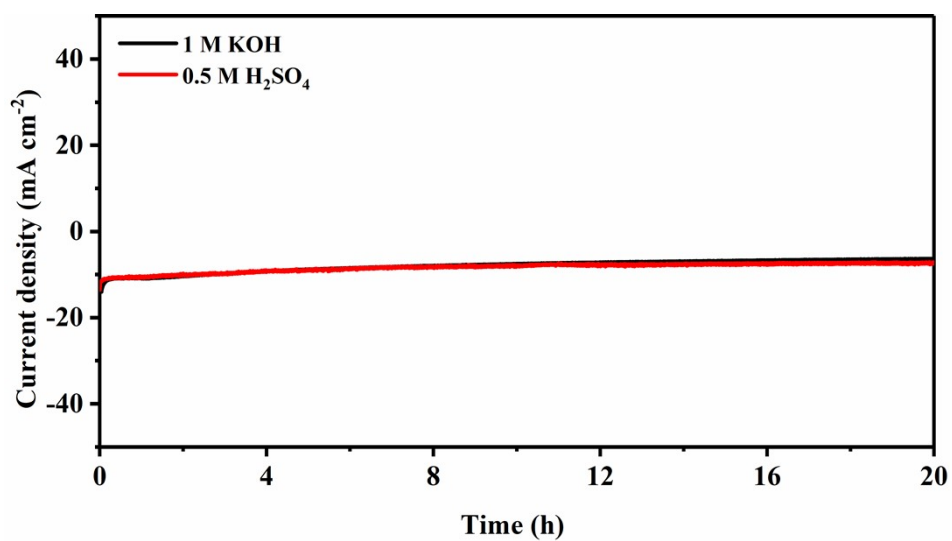

**Figure S18** I-t curve at the current density of Co-MoC/Mo<sub>2</sub>C-0.5 in both 0.5 M H<sub>2</sub>SO<sub>4</sub> and 1 M KOH.

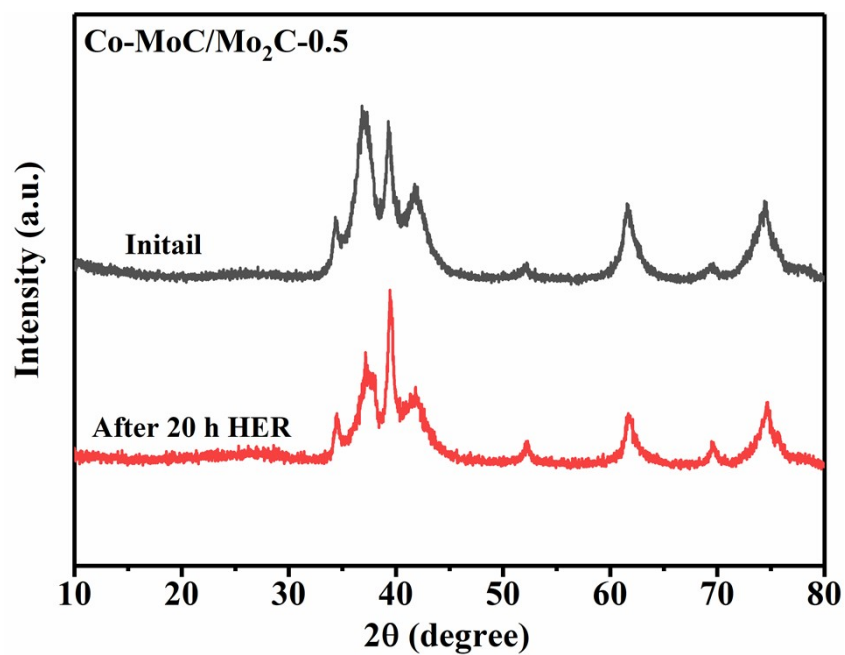

**Figure S19** XRD patterns of the Co-MoC/Mo<sub>2</sub>C-0.5 catalyst before and after 20 h durability test. The results show that the Co-MoC/Mo<sub>2</sub>C-0.5 catalyst has a highly stability.

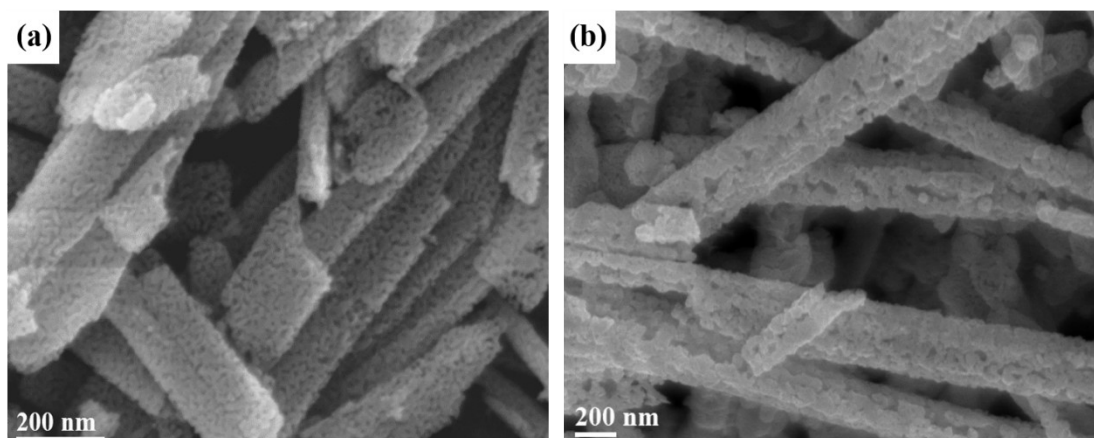

**Figure S20** SEM images of Co-MoC/Mo<sub>2</sub>C-0.5 catalyst (a) before and (b) after 20 h durability test.



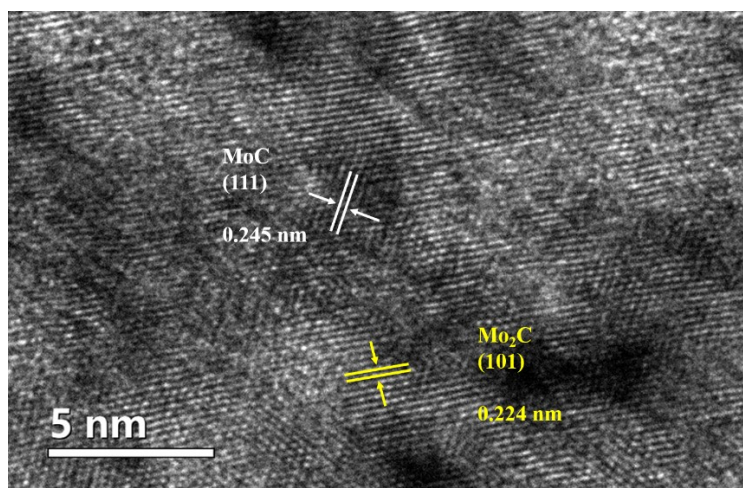

**Figure S21** TEM images of Co-MoC/Mo<sub>2</sub>C-0.5 catalyst after 20 h durability test. The almost unchanged TEM images of the Co-MoC/Mo<sub>2</sub>C-0.5 electrode before and after the stability test shows that the catalyst has super stability.

### Reference:

- [1] M. Li, Y. Zhu, H. Wang, C. Wang, N. Pinna, X. Lu, *Adv. Energy Mater.* 9 (2019) 1803185.
- [2] H. Lin, Z. Shi, S. He, X. Yu, S. Wang, Q. Gao, Y. Tang, *Chem. Sci.* 7 (2016) 3399-3405.
- [3] Z. Wu, J. Wang, R. Liu, K. Xia, C. Xuan, J. Guo, W. Lei, D. Wang, *Nano Energy* 32 (2017) 511-519.
- [4] X. Zhang, J. Wang, T. Guo, T. Liu, Z. Wu, L. Cavallo, Z. Cao, D. Wang, *Appl. Catal., B* 247 (2019) 78-85.
- [5] H. Yan, Y. Xie, Y. Jiao, A. Wu, C. Tian, X. Zhang, L. Wang, H. Fu, *Adv. Mater.* 30 (2018) 1704156.
- [6] Q. Liang, H. Jin, Z. Wang, Y. Xiong, S. Yuan, X. Zeng, D. He, S. Mu, *Nano Energy* 57 (2019) 746-752.
- [7] L. Zhang, H. Yang, D.K. Wanigarathna, B. Liu, *Small Methods* 2 (2018) 1700353.
- [8] X. Fan, Y. Liu, Z. Peng, Z. Zhang, H. Zhou, X. Zhang, B.I. Yakobson, W.A. Goddard, X. Guo, R.H. Hauge, J.M. Tour, *ACS Nano* 11 (2017) 384-394.
- [9] K. An, X. Xu, X. Liu, *ACS Sustain. Chem. Eng.* 6 (2018) 1446-1455.
- [10] T. Ouyang, Y.-Q. Ye, C.-Y. Wu, K. Xiao, Z.-Q. Liu, *Angew. Chem., Int. Ed.* 58 (2019) 4923-4928.
- [11] Z. Liu, S. Zhou, S. Xue, Z. Guo, J. Li, K. Qu, W. Cai, *Chem. Eng. J.* 421 (2021) 127807
